# Supplementary material
Source: publisher figshare collection journal article supplement (https://acs.figshare.com/ndownloader/files/4229008)
Supplement: Supplementary file 1 [file 4229008]

# Supporting Information

## **Influence of the Pd(II) coordination model on the catalytic performance of Pd-PPh<sub>2</sub>-SBA-15 in C-C bond forming reactions**

**Jianlin Huang,<sup>a</sup> Meitao Wang,<sup>a</sup> Siyong Zhang,<sup>b</sup> Bingwen Hu,<sup>\*,b</sup> Hexing Li<sup>\*,a</sup>**

<sup>a</sup>The Education Ministry Key Lab of Resource Chemistry, Shanghai Key Laboratory of Rare Earth Functional Materials, Shanghai Normal University, Shanghai 200234, China.

<sup>b</sup>Physics Department & Shanghai Key Laboratory of Magnetic Resonance, East China Normal University, Shanghai 200062, China.

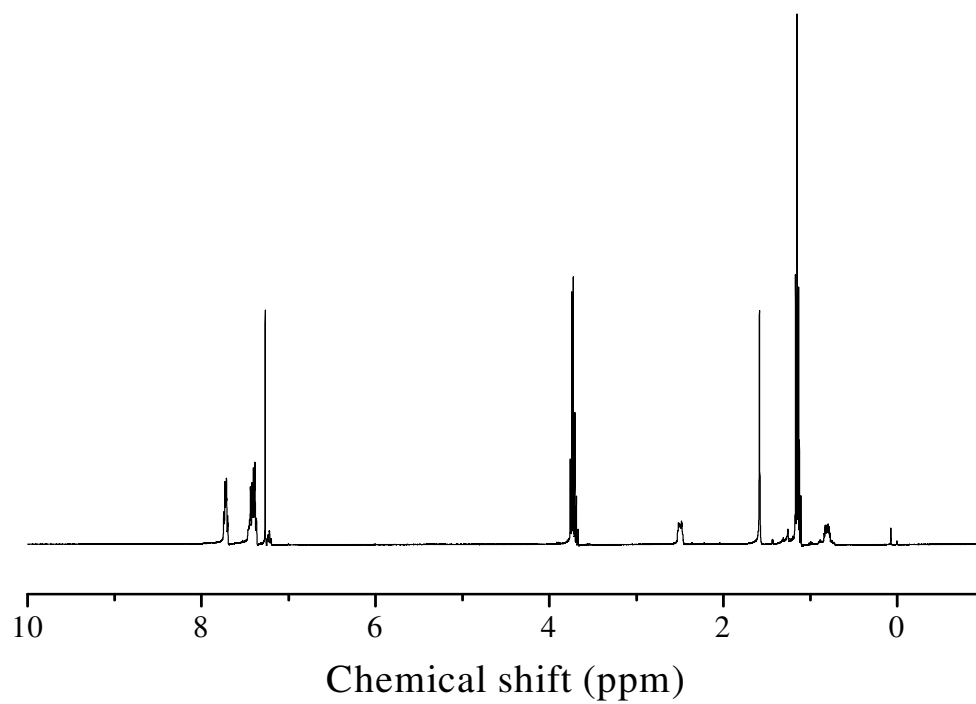

Figure S1.  $^1\text{H}$  NMR spectra of  $\text{PdCl}_2[\text{PPh}_2(\text{CH}_2)_2\text{Si}(\text{OCH}_2\text{CH}_3)_3]_2$  organometallic silane dissolved in  $\text{CD}_2\text{Cl}_2$ .
